# Supplementary material for: Translation, cross-cultural adaptation and psychometric properties of the Nepali versions of numerical pain rating scale and global rating of change
Source: Springer Nature journal article supplement (doi:10.1186/s12955-017-0812-8), 2017-12-01
Supplement: MOESM1 [file 15277404]

## दुखाइको तिब्रता मापन प्रश्नावली

### प्रारम्भिक जाँच :

म तपाईंको \_\_\_\_\_ दुखाइको मात्रा सोध्न गइरहेको छु । तपाईंले आफ्नो दुखाइलाई ० देखि १० सम्मको अंकमा मूल्यांकन गर्नु पर्ने हुन्छ । सुन्ना “०” भनेको “दुखेको छैन” हो भने “१०” भनेको अत्याधिक दुखाइ (अथवा सहन नसक्ने दुखाइ) हो ।

### कृपया आफ्नो दुखाइको तिब्रता मूल्यांकन गर्नुहोस् ।

- “अहिले ० देखि १० मा कति दुखेको छ ?”
- “बितेको २४ घण्टाको सबै भन्दा धेरै दुखाइ कति थियो?”
- “बितेको २४ घण्टाको सबै भन्दा कम दुखाइ कति थियो?”

### कुनै एक अंक भन्नुहोस् वा एक अंकमा चिन्ह लगाउनुहोस् ।

० १ २ ३ ४ ५ ६ ७ ८ ९ १०  
दुखाइ छैन अत्याधिक दुखाइ  
(सहन नसक्ने दुखाइ)

|                                        | प्रारम्भिक जाँच<br>मिति | पुन जाँच<br>मिति | पुन जाँच<br>मिति |
|----------------------------------------|-------------------------|------------------|------------------|
| अहिलेको दुखाइ                          |                         |                  |                  |
| बितेको २४ घण्टाको सबै भन्दा धेरै दुखाइ |                         |                  |                  |
| बितेको २४ घण्टाको सबै भन्दा कम दुखाइ   |                         |                  |                  |
| जम्मा                                  |                         |                  |                  |

NPRS दुखाइ स्कोर
