# Supplementary material for: Translation, cross-cultural adaptation and psychometric properties of the Nepali versions of numerical pain rating scale and global rating of change
Source: Springer Nature journal article supplement (doi:10.1186/s12955-017-0812-8), 2017-12-01
Supplement: MOESM2 [file 15277404]

## समग्र परिवर्तन मापन प्रश्नावली

|      | प्रथम उपचार | दोश्रो उपचार | अन्तिम उपचार |
|------|-------------|--------------|--------------|
| GROC | XX          | / /          | / /          |

मिति : \_\_\_\_ / \_\_\_\_ / \_\_\_\_  
दिन महिना वर्ष

तपाईंले पहिलो पटक उपचारको क्रममा आउँदा आफ्नो समस्या कसरी बयान गर्नु भएको थियो र पहिलेको तुलनामा आज कस्तो अनुभव गर्नु भएको छ ? कृपया बयान गर्नुहोस् ।  
(केवल एक मात्र बाकसमा “✓” चिन्ह लगाउनुहोस्):

- ७  धेरै सुधार
- ६  मध्यम सुधार
- ५  थोरै सुधार
- ४  पहिले जस्तै
- ३  थोरै बिग्रिएको
- २  मध्यम बिग्रिएको
- १  धेरै बिग्रिएको

### फिजियोथेरापिस्ट:

“मध्यम बिग्रिएको” अथवा “धेरै बिग्रिएको” बाकसमा चिन्ह लगाउनु भएमा कारण पनि उल्लेख गर्नुहोस् ।
